# Supplementary material for: Global Consumption Trend of Antifungal Agents in Humans From 2008 to 2018: Data From 65 Middle- and High-Income Countries
Source: Springer Nature journal article supplement (doi:10.1007/s40265-022-01751-x), 2022-07-01
Supplement: 40265_2022_1751_MOESM1_ESM.pdf [file 40265_2022_1751_MOESM1_ESM.pdf]

**Global consumption trend of antifungal agents in humans from 2008 to 2018: data from 65 middle- and high-income countries**

**Supplementary material**

**Supplementary Table 1.** The list of countries included in the analysis and the consumption of antifungal agents in 2018 expressed in DDD/1000 inhabitants/day

| Country                        | Consumption of antifungal agents in 2018 (DDD/1000 inhabitants/day) | Sectors covered by the IQVIA dataset | Coverage (%) |
|--------------------------------|---------------------------------------------------------------------|--------------------------------------|--------------|
| <b>Middle-income countries</b> |                                                                     |                                      |              |
| Algeria                        | 0.785760                                                            | Retail                               | 80           |
| Argentina                      | 0.621691                                                            | Retail                               | 73           |
| Belarus                        | 0.810291                                                            | Retail and hospital                  | 100          |
| Bosnia and Herzegovina         | 0.126032                                                            | Retail                               | 95           |
| Brazil                         | 1.199633                                                            | Retail                               | 97           |
| Bulgaria                       | 0.761074                                                            | Retail and hospital                  | 98           |
| China                          | 0.160904                                                            | Retail and hospital                  | 72           |
| Colombia                       | 0.639731                                                            | Retail                               | 71           |
| Ecuador                        | 0.956383                                                            | Retail                               | 80           |
| Egypt                          | 0.404348                                                            | Retail                               | 75           |
| India                          | 1.723632                                                            | Retail                               | 95           |
| Jordan                         | 0.135072                                                            | Retail                               | 71           |
| Kazakhstan                     | 0.580207                                                            | Retail and hospital                  | 100          |
| Lebanon                        | 1.010133                                                            | Retail                               | 77           |
| Mexico                         | 0.427554                                                            | Retail                               | 61           |
| Morocco                        | 0.330253                                                            | Retail                               | 88           |
| Pakistan                       | 0.326338                                                            | Retail                               | 85           |
| Peru                           | 0.839937                                                            | Retail                               | 67           |
| Philippines                    | 0.026854                                                            | Retail and hospital                  | 100          |
| Romania                        | 0.782234                                                            | Retail and hospital                  | 100          |
| Russia                         | 1.287239                                                            | Retail and hospital                  | 97           |
| Serbia                         | 0.195835                                                            | Retail                               | 93           |
| South Africa                   | 0.274218                                                            | Retail                               | 62           |
| Thailand                       | 0.288247                                                            | Retail and hospital                  | 71           |
| Tunisia                        | 0.666418                                                            | Retail and hospital                  | 100          |
| Turkey                         | 1.643903                                                            | Retail                               | 100          |
| Venezuela                      | 0.172807                                                            | Retail                               | 78           |
| <b>High-income countries</b>   |                                                                     |                                      |              |
| Australia                      | 1.040098                                                            | Retail and hospital                  | 90           |
| Austria                        | 0.929931                                                            | Retail and hospital                  | 100          |
| Belgium                        | 3.366653                                                            | Retail and hospital                  | 99           |
| Canada                         | 0.778622                                                            | Retail and hospital                  | 100          |
| Chile                          | 0.826619                                                            | Retail                               | 71           |
| Croatia                        | 0.520818                                                            | Retail and hospital                  | 98           |
| Czech Republic                 | 0.679239                                                            | Retail and hospital                  | 95           |

|                      |          |                     |     |
|----------------------|----------|---------------------|-----|
| Estonia              | 1.505872 | Retail              | 88  |
| Finland              | 1.955249 | Retail and hospital | 100 |
| France               | 1.341590 | Retail and hospital | 100 |
| Germany              | 0.921194 | Retail and hospital | 100 |
| Greece               | 1.739643 | Retail              | 60  |
| Hungary              | 1.106525 | Retail and hospital | 100 |
| Ireland              | 1.153609 | Retail and hospital | 100 |
| Italy                | 1.153446 | Retail and hospital | 99  |
| Japan                | 0.572036 | Retail and hospital | 100 |
| Kuwait               | 0.191237 | Retail              | 35  |
| Latvia               | 0.857868 | Retail and hospital | 100 |
| Lithuania            | 0.779379 | Retail and hospital | 99  |
| Luxembourg           | 1.458587 | Retail              | 98  |
| Netherlands          | 1.404919 | Retail and hospital | 91  |
| New Zealand          | 1.672487 | Retail and hospital | 97  |
| Norway               | 1.507496 | Retail and hospital | 100 |
| Poland               | 1.168455 | Retail and hospital | 100 |
| Portugal             | 2.204436 | Retail and hospital | 100 |
| Puerto Rico          | 1.128264 | Retail and hospital | 93  |
| Saudi Arabia         | 0.284742 | Retail              | 45  |
| Slovakia             | 0.832482 | Retail and hospital | 97  |
| Slovenia             | 0.961012 | Retail              | 98  |
| South Korea          | 1.893054 | Retail              | 99  |
| Spain                | 0.721916 | Retail and hospital | 99  |
| Sweden               | 0.949579 | Retail and hospital | 100 |
| Switzerland          | 1.061542 | Retail and hospital | 100 |
| Taiwan               | 0.294875 | Hospital            | 83  |
| United Arab Emirates | 0.818168 | Retail              | 45  |
| United Kingdom       | 1.219625 | Retail and hospital | 89  |
| United States        | 1.516197 | Retail and hospital | 89  |
| Uruguay              | 0.750649 | Retail              | 71  |

---

Country income levels are based on the 2018 World Bank classification.

The projected sales volumes form the basis of the MIDAS database used in our analysis. Details regarding sales volume in the community versus hospital sectors are not available in the IQVIA-MIDAS database. The information presented in Supplementary Table 1 represents coverage of the raw sales data sourced by IQVIA at the local level. To account for the fact that not all wholesalers from all sectors contribute their sales data, projections on the raw sales data was applied by IQVIA to estimate the total sales volume, based on knowledge of the market share of participating wholesalers in each country. Our results are representative of the true total sales volume in each country and are not affected by the limited raw data sources found in a few countries.

**Supplementary Table 2. Assessing the antifungal consumption trend using Mann-Kendall test**

| <b>Antifungal agent</b> | <b>p-value</b> |
|-------------------------|----------------|
| <b>Echinocandins</b>    | 2.624e-05      |
| Anidulafungin           | 2.624e-05      |
| Caspofungin             | 0.005069       |
| Micafungin              | 0.0001864      |
| <b>Imidazoles</b>       | 0.003093       |
| Ketoconazole            | 0.003093       |
| Miconazole              | 9.922e-05      |
| <b>Polyenes*</b>        | 0.01273        |
| Amphotericin B          | 0.01273        |
| <b>Triazoles</b>        | 9.922e-05      |
| Fluconazole             | 0.0001864      |
| Isavuconazole           | 0.002663       |
| Itraconazole            | 5.161e-05      |
| Posaconazole            | 0.08677        |
| Voriconazole            | 2.624e-05      |
| <b>Others</b>           | 2.624e-05      |
| Terbinafine             | 2.624e-05      |
| Flucytosine             | 0.6404         |

**Supplementary Figure 1. Comparison of oral versus parenteral fluconazole in middle- and high-income countries**

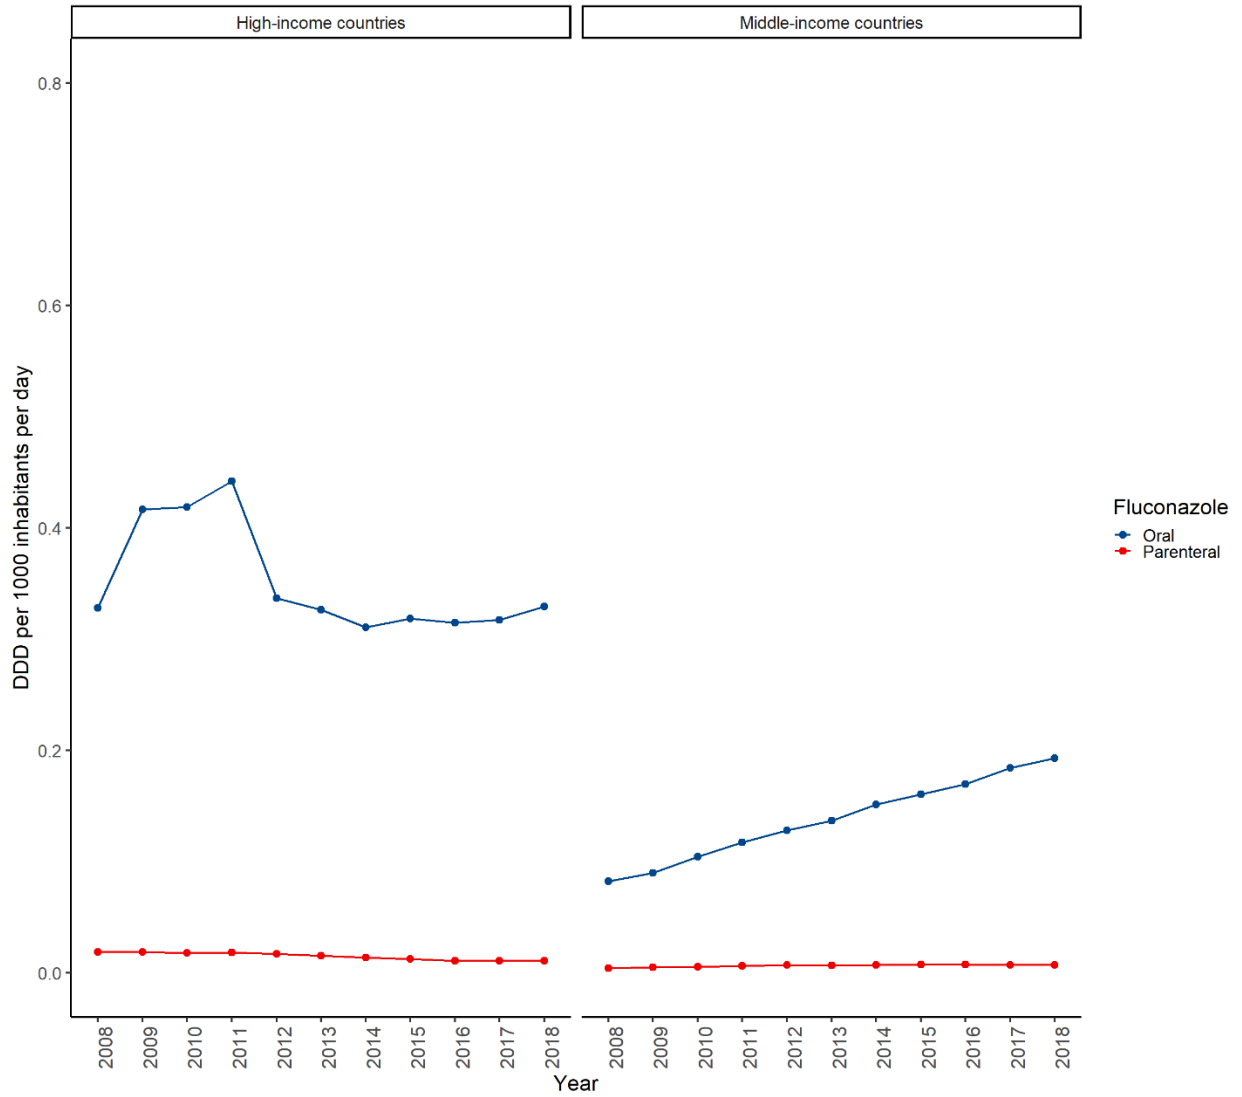

DDD, defined daily dose.

**Supplementary Figure 2. Comparison of oral versus parenteral itraconazole in middle- and high-income countries**

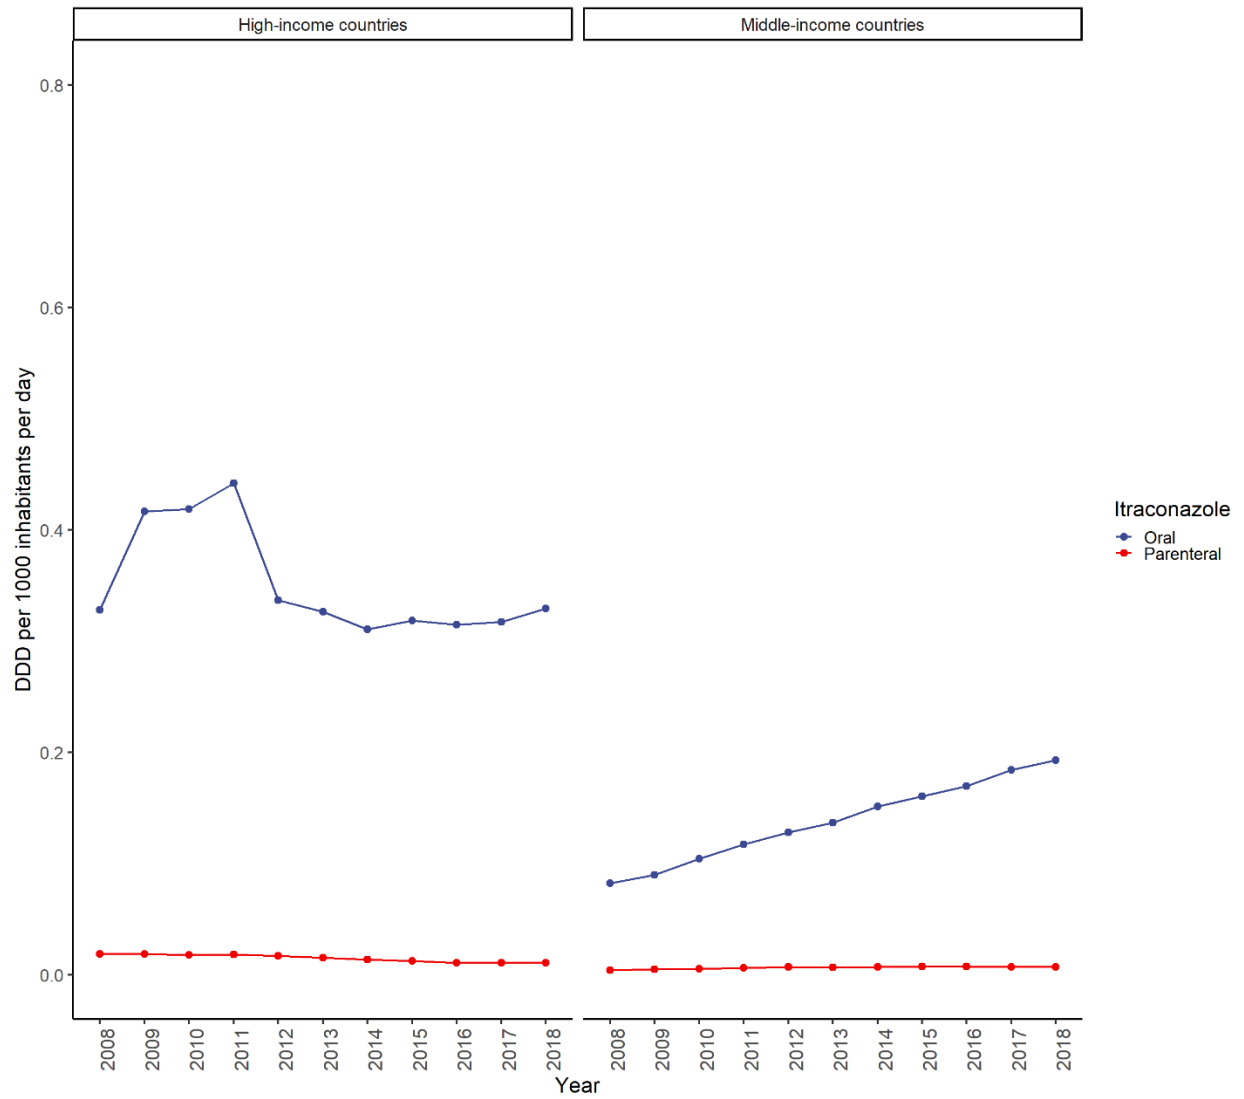

DDD, defined daily dose.
